# Supplementary material for: Caenorhabditis elegans sine oculis/SIX-type homeobox genes act as homeotic switches to define neuronal subtype identities
Source: PubMed Central journal article supplement — Proc Natl Acad Sci U S A. 2022 Sep 6;119(37):e2206817119. doi: 10.1073/pnas.2206817119 (PMC9478639; doi:10.1073/pnas.2206817119), 2022-09-06
Supplement: pnas.2206817119.sapp.pdf [file pnas.2206817119.sapp.pdf]

## **Supporting Information for**

*C. elegans* Sine oculis/SIX-type homeobox genes act as homeotic switches to define neuronal subtype identities

Cyril Cros and Oliver Hobert

Oliver Hobert  
Email: or38@columbia.edu

### **This PDF file includes:**

Figures S1 to S8  
Tables S1  
SI References

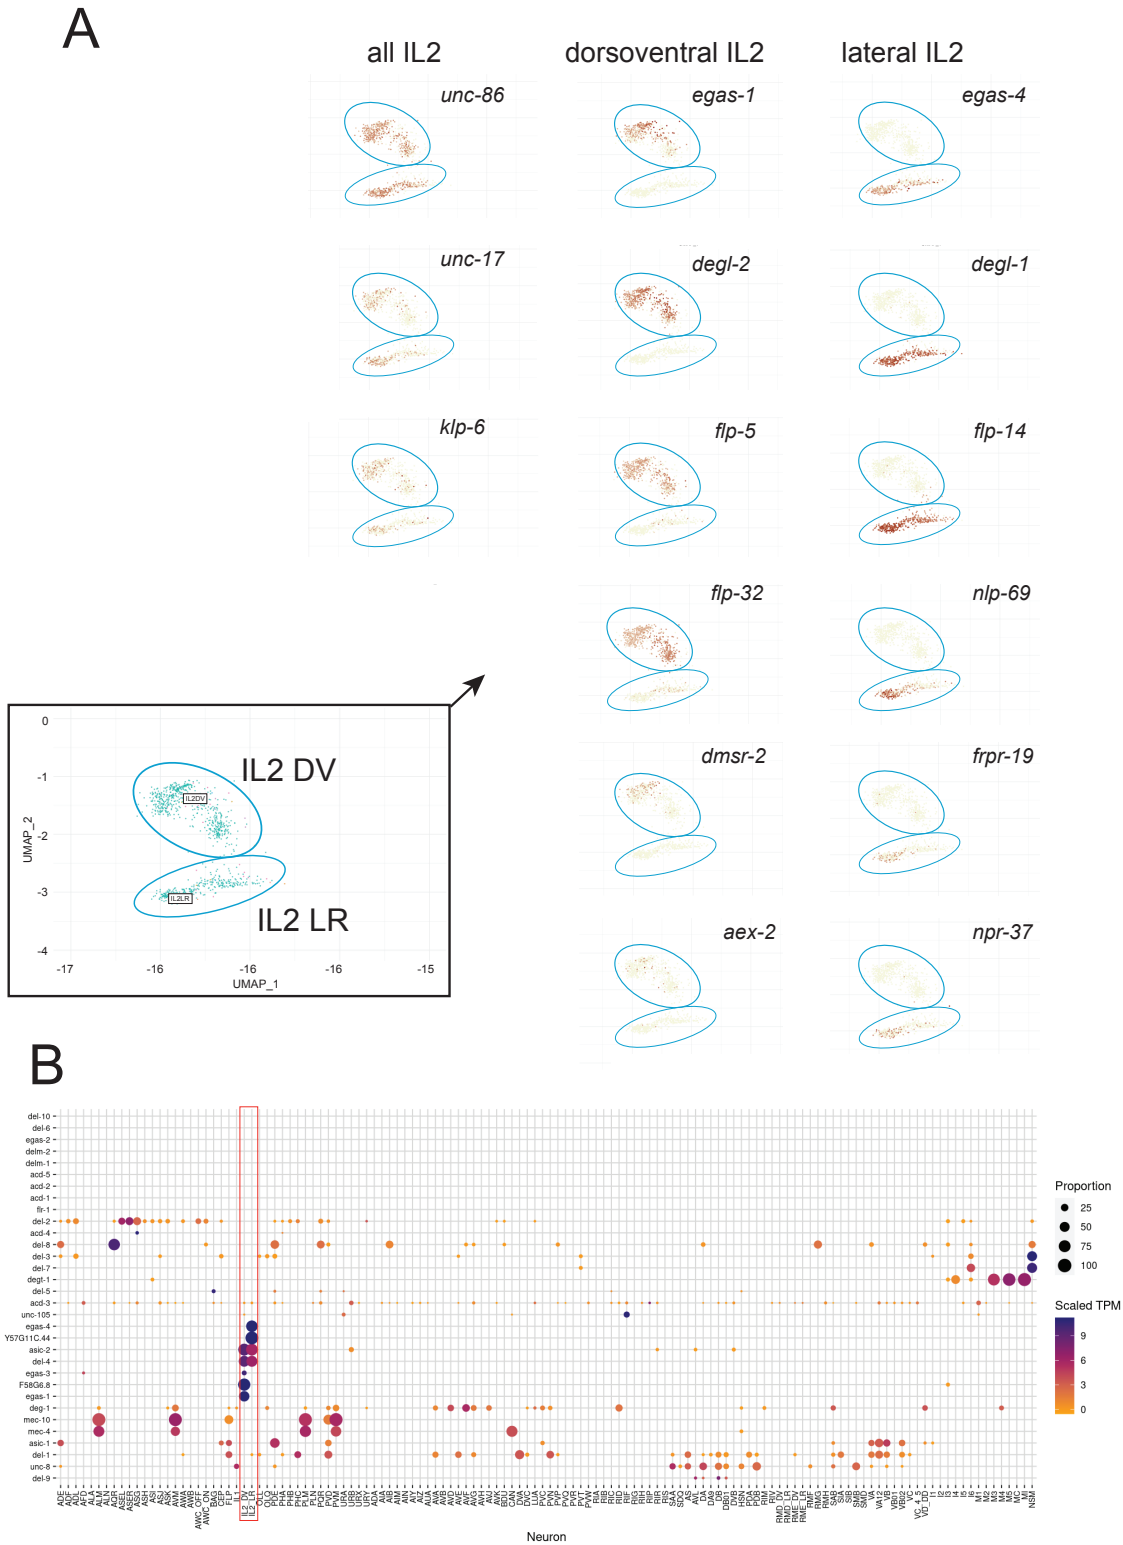

**Fig.S1: IL2 subtype markers revealed by scRNA analysis**

Single cell transcriptome data, displayed with the Cengen App (Taylor et al., 2021).

**A:** Single cell UMAP plots for each individual IL2 markers.

**B:** Expression of all members of the DEG/ENaC/ASIC family of ion channels throughout the *C. elegans* nervous system.

A

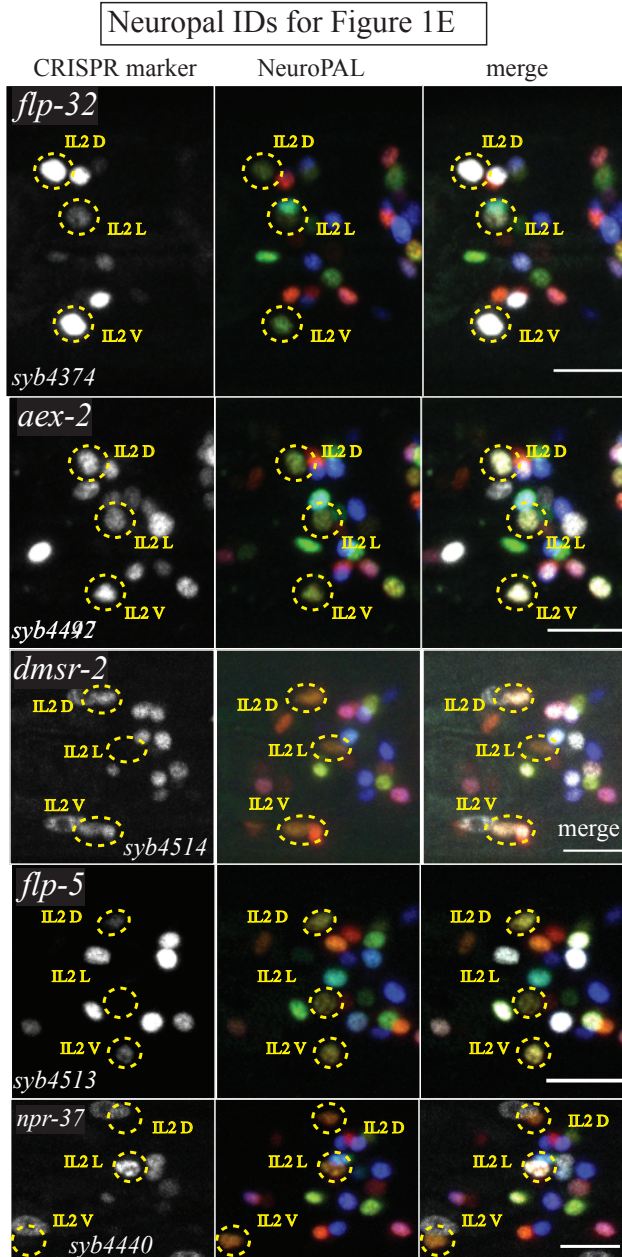

B

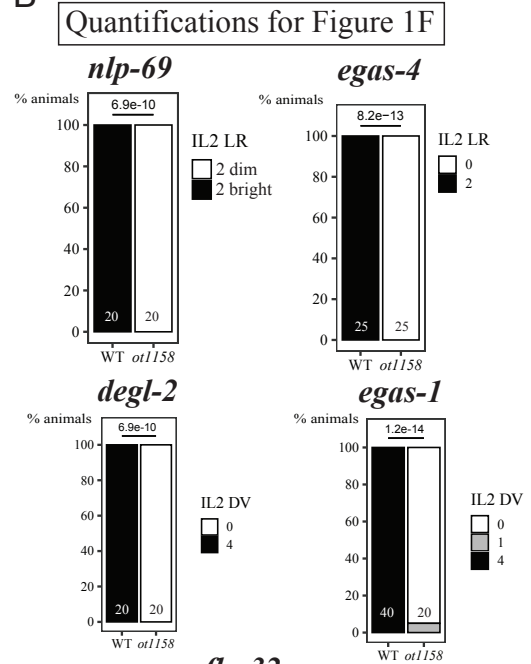

C

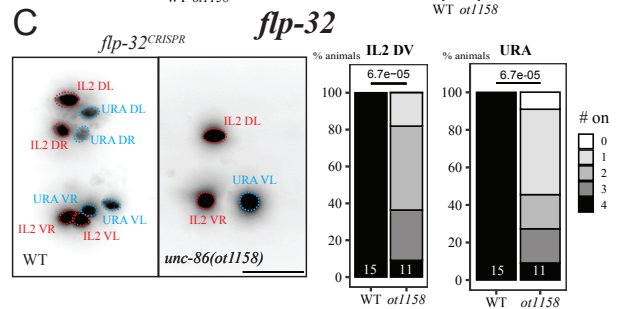

D

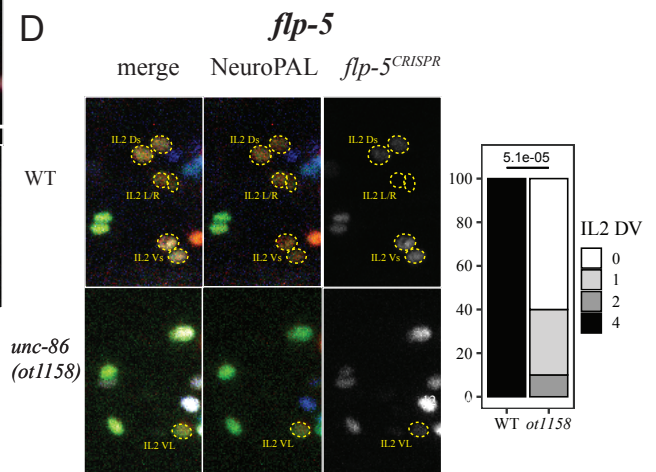

### Fig.S2: NeuroPAL IDs and scoring for *unc-86* dependency of IL2 subtype markers

**A:** NeuroPAL pictures for Fig 1F CRISPR reporters *flp-32*(syb4374), *aex-2*(syb4447), *dmsr-2*(syb4514), *flp-5*(syb4513), *npr-37*(syb4440)

**B:** Quantification of Fig 1 G *unc-86* dependent IL2 lateral markers *nlp-69*(syb4512) *egas-4* / *otIs833* and IL2 dorsoventral markers *degl-2*(syb5229) *egas-1* / *otIs846*, p-values by Fisher two-sided test.

**C:** *flp-32* IL2 DV and URA expression is dependent on *unc-86*, using the *flp-32*(syb4374) reporter in the *unc-86*(*ot1158*) null allele. *flp-32* is expressed at a much weaker level in IL2 L/R and was not scored here

**D:** *flp-5* IL2 DV expression is *unc-86* dependent, using the *flp-5*(syb4513) reporter in the *unc-86*(*ot1158*) null allele.



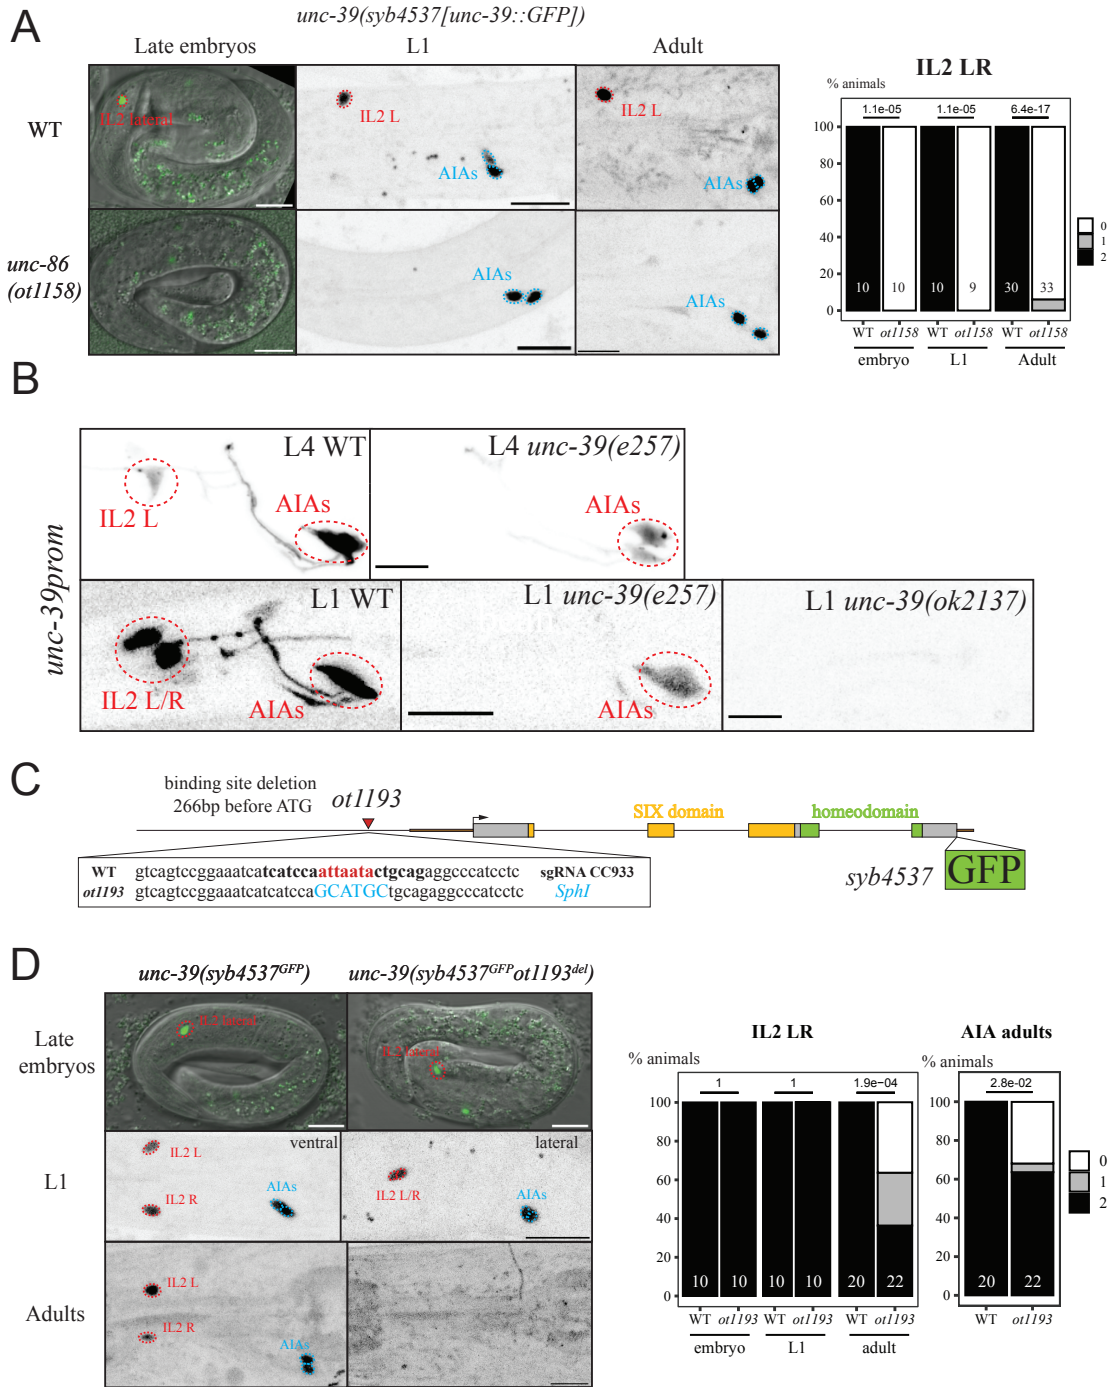

**Fig.S3: *unc-39* regulation**

**A:** Initiation and maintenance of *unc-39* expression in the lateral IL2 neurons (measured with the CRISPR/Cas9-engineered reporter allele *syb4537*) is *unc-86* dependent. AIA neurons do not express *unc-86* and *unc-39* expression is unaffected in these neurons.

**B:** A 2.3kb *unc-39* promoter fusion (chromosomal integrant *ot1s854*) displays diminished expression in both lateral IL2 and AIA in the *unc-39* mutants, with stronger effects in IL2 vs AIA, and in the *ok2137* null animals (which can only be scored as arrested L1) vs the *e257* hypomorph (which can be scored at later stages).

**C:** Molecular details of the *unc-39(syb4537<sup>GFP</sup>ot1193<sup>bs-del</sup>)* putative binding site deletion.

**D:** The homeodomain binding site mutation engineered with CRISPR/Cas9 into the *unc-39* reporter allele (*unc-39(syb4537<sup>GFP</sup>ot1193<sup>bs-del</sup>)*) does not affect embryonic initiation but maintenance of *unc-39* expression in adult lateral IL2 and AIA neurons.

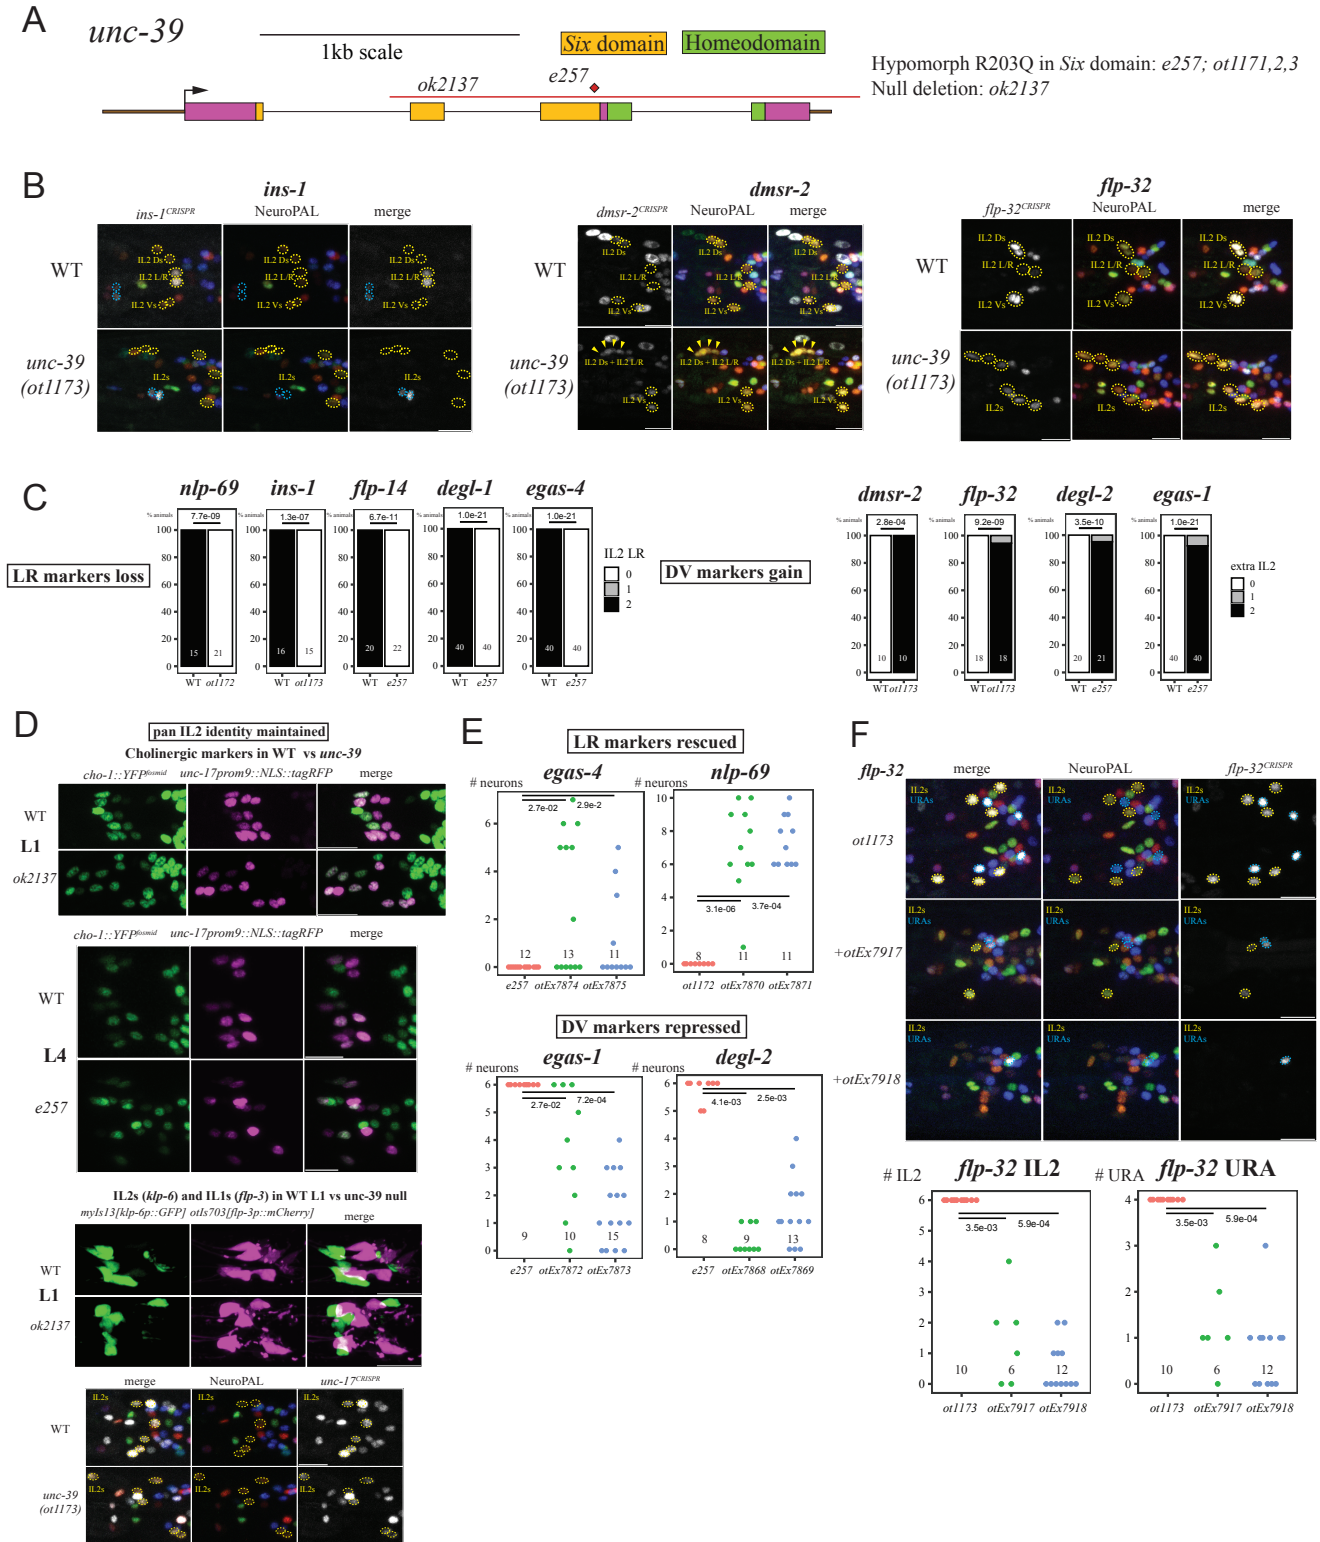

**Fig.S4: *unc-39* gene model and functional analysis.**

**A:** *unc-39* gene model with SIX and homeodomain protein domains, and mutant alleles (null *ok2137* and *unc-39*<sup>R203Q</sup> hypomorphs *e257*, *ot1171*, *ot1172* and *ot1173*).

**B:** Effect of *unc-39* on various IL2 fate markers *ins-1*(*syb5452*) *dmsr-2*(*syb4514*) *flp-32*(*syb4374*) (from Fig.2E/F), with NeuroPAL images included for cell identification purposes. Note that a pair of pharynx neurons (blue circle, with no NeuroPAL coloring) express *ins-1*.

**C:** Quantifications for **Fig.2E/F** marker losses with markers *nlp-69*(*syb4512[nlp-69::SL2::gfp::H2B]*), *ins-1*(*syb5452[ins-1::SL2::gfp::H2B]*), *flp-14*(*syb3323[flp-14::SL2::gfp::H2B]*), *degl-1* (*otls825*) and *egas-4* (*otls833*) for the lateral IL2; *dmsr-2*(*syb4514[dmsr-2::SL2::gfp::H2B]*), *flp-32*(*syb4374[flp-32::SL2::gfp::H2B]*), *degl-2*(*syb5229[degl-2::SL2::gfp::H2B]*) and *egas-1*(*otls846*) for the dorsoventral IL2. Dorsoventral marker gain was counted as all or nothing, reporting extra cell counts (0,1 or 2 cells past the usual 4 cells). For *flp-32* the very dim lateral IL2 wild type expression was not counted as proper expression, in the mutant IL2 are always brighter than this. Fisher test p-values are shown on top, number of worms on the bottom.

**D:** Pan-IL2 identity is not affected in the *unc-39* null or the *unc-39*<sup>R203Q</sup> hypomorphic allele, as assessed by unaffected expression of the *unc-17prom9* fragment (*otEx6986*), the *cho-1* fosmid reporter (*otls354*), the *klp-6* reporter *myls13*, the IL1 *flp-3* reporter *otls703*, the *unc-17* reporter allele *syb4491* or the NeuroPAL color code (which also derives from *klp-6*).

**E:** Quantifications for **Fig.2E/F** *unc-39* misexpression experiments. Lateral markers, *egas-4* (*otls833*) and *nlp-69*(*syb4512[nlp-69::SL2::gfp::H2B]*), are fully off in *e257* control, but were counted as on even if only weakly expressed. Dorsoventral markers, *egas-1*(*otls846*) and *degl-2*(*syb5229[degl-2::SL2::gfp::H2B]*), are counted as off if visibly weaker than in the *e257* control. Each dot is a worm, on the y-axis is the number of neurons expressing the marker. There are sometimes more neurons than just the six IL2 for *egas-4* and *nlp-69*. Wilcoxon rank sum tests were done for each line vs the hypomorph with p-values on top, number of worms on the bottom.

**F:** Effect of ectopic *unc-39* on *flp-32*(*syb4374[flp-32::SL2::gfp::H2B]*), expression (from **Fig.2E**), with NeuroPAL images included, as well as quantifications below for IL2 on the left, URA on the right. The *unc-39*(*ot1073*) animals are shown in a ventral view.

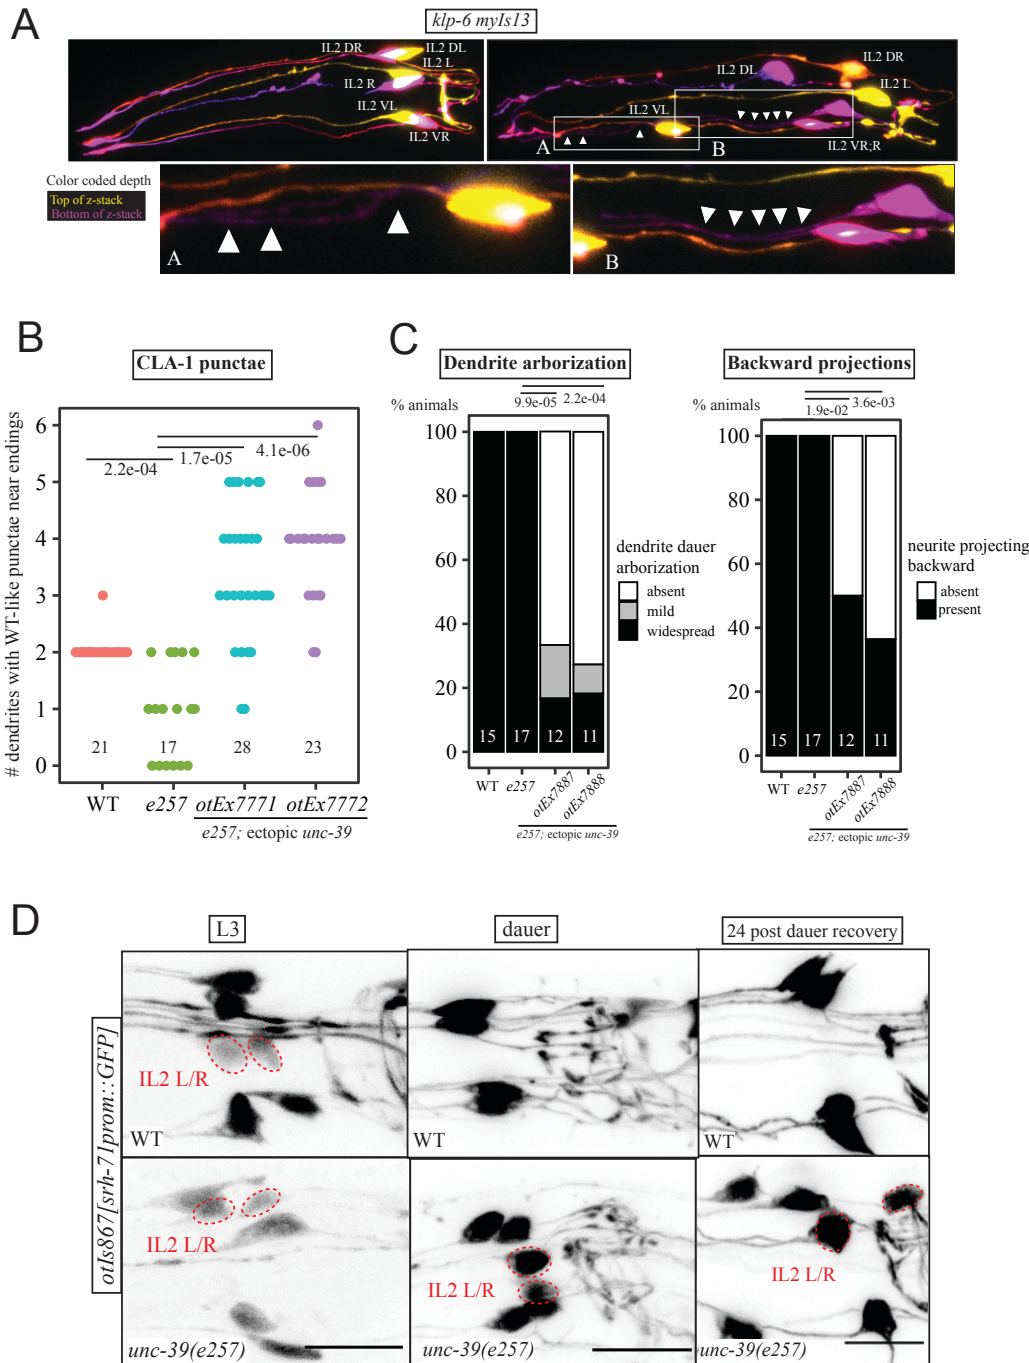

**Fig.S5: *unc-39* affects IL2 morphology**

**A: Top:** same images as Fig.3A of a *klp-6* (*myIs13*) cytoplasmic reporter. To better show fasciculation it is now depth-coded (orange is top of the stack, purple on bottom). On the left a wildtype image of the left/right pairs show up as yellow/purple, but on the right *unc-39* mutant panel, the right lateral IL2 joins the right ventral IL2 cell body and their dendrite fasciculate. **Bottom:** blow-up images.

**B:** GFP::CLA-1 punctae quantification, by taking the number of dendrites per worm that have multiple bright punctae before the cilia, like in the wild type lateral IL2. P-values are computed by Wilcoxon rank sum test.

**C:** Dauer arborization phenotype quantification. We scored if branching was similar to wild type and *e257* mutant animals, reduced or fully gone. We then scored whether we observed neurites projecting backward.

**D:** The same *srh-71* reporter (*otIs867*) is shown left to right at L3, in dauer and 24 hours after replating dauers on fresh food. Wildtype animals are on top, *unc-39* mutants at the bottom. Notice that after recovery the lateral IL2 are gone in the wild type, but are equally bright as the dorsoventral IL2.



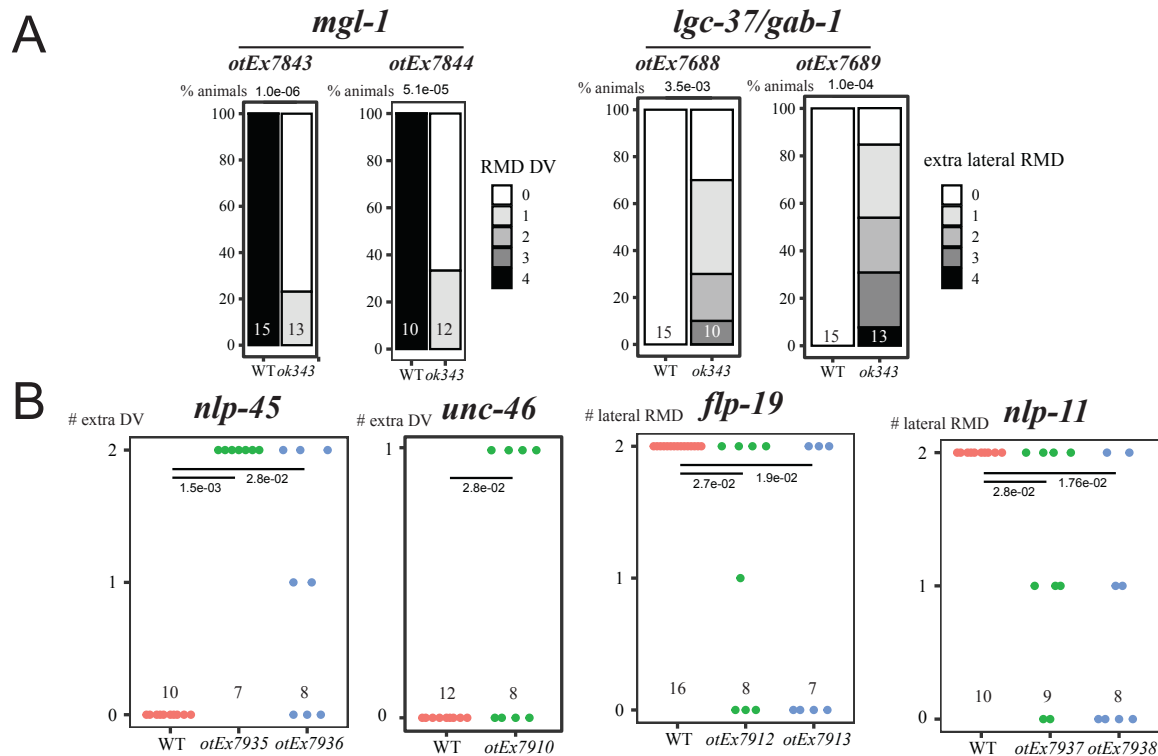

**Fig.S6: Quantification of *ceh-32* loss- and gain-of-function experiments**

**A:** Quantifications for the loss of *mgl-1* in the dorsoventral RMD across the two lines (*otEx7843*, *otEx7844*) and the gain of *lgc-37* in the lateral RMD (counting only extra cells beyond the usual two lateral RMD), in lines *otEx7688* and *otEx7689*. P-values were obtained by two-sided Fisher test.

**B:** Quantification for the misexpression experiments. Dorsoventral markers *nlp-45*(*ot1032*) and *unc-46* *otIs568* are gained (only one lateral RMD at most for *unc-46*). The lateral markers *flp-19*(*syb3278*) and *nlp-11*(*syb4759*) are lost. Note that only one line is shown for *unc-46*, with only one lateral RMD being reprogrammed at most; another line *otEx7911* was considered but had no effect on the lateral RMD. P-values were obtained by Wilcoxon rank sum test.

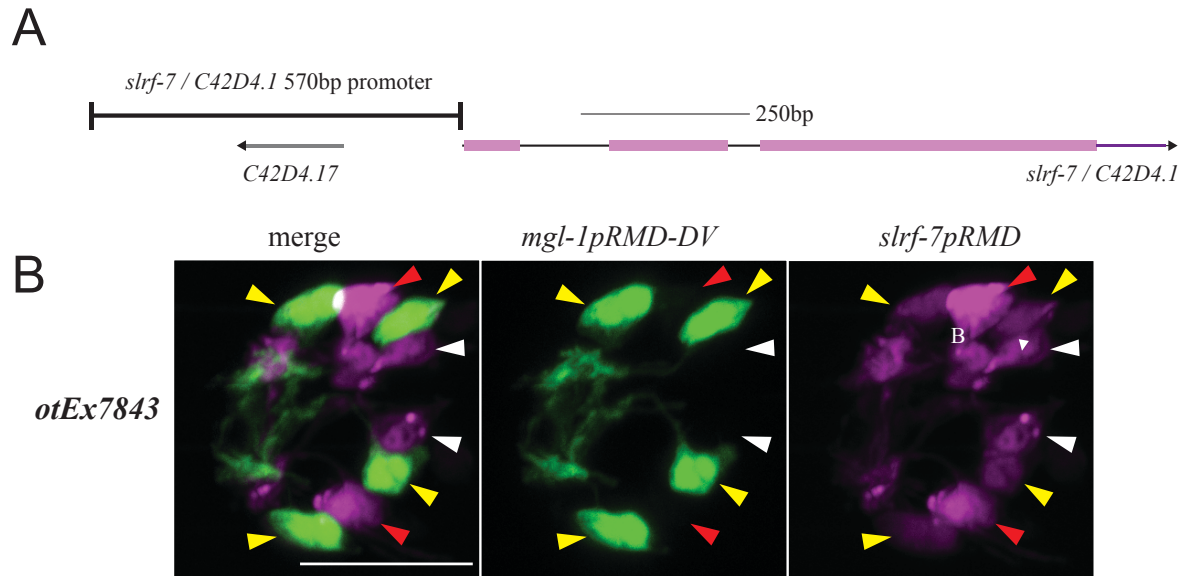

**Fig.S7: Characterization of the *C42D4.1/slrf-7* pan-RMD driver**

**A:** Genome structure of our *C42D4.1/slrf-7* promoter we use as a pan-RMD driver

**B:** Annotated close up of the *otEx7843* panel from **Fig.4C**, demonstrating that *slrf-7* is expressed in all RMDs. The animal is in a ventral position. The yellow triangles point to cells expressing both *slrf-7* and a *mgl-1* fragment known to be specific of the dorsoventral RMD subtype. The red triangles point to the lateral RMD, between the RMD of the previous subtype, with a brighter *slrf-7* expression in this subtype. White triangles point to the dorsal SAAs, based on both the CeNGEN scRNA atlas and the fact that they make projections anteriorly in the sublaterals. The ventral SAA rarely express *slrf-7*, depending on transgenic lines.

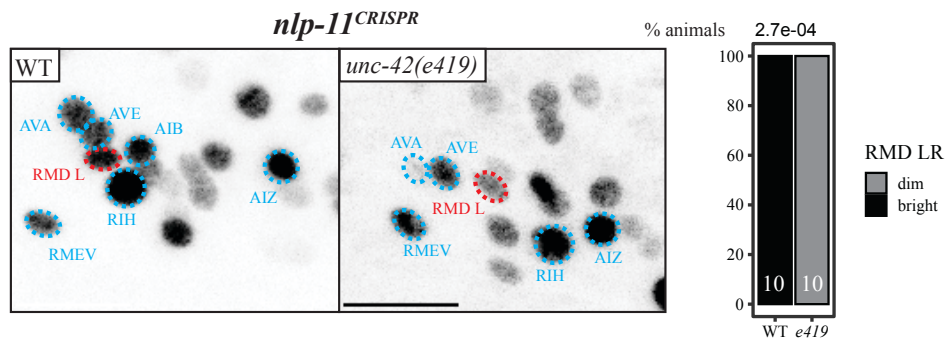

**Fig.S8: Effect of *unc-42* on *nlp-11* expression**

The lateral RMD subtype marker *nlp-11*(*syb4759*) becomes dim in the *unc-42*(*e419*) mutant. The lateral RMD are circled in red, neighbouring neurons are circled in blue. We used *unc-42* independent neurons like RMEV or RIH to assess brightness changes. Significance was calculated by Fisher two-sided test.

**Table S1: Strain list**

| <b>Strain Name</b> | <b>Mutant or knock-in</b>                                                                | <b>Array name</b>           | <b>DNA on array</b>                                              | <b>Reference</b>         |
|--------------------|------------------------------------------------------------------------------------------|-----------------------------|------------------------------------------------------------------|--------------------------|
| OH17019            |                                                                                          | <i>otls825</i>              | <i>degl-1prom::GFP unc-122prom::GFP</i>                          | This study               |
| OH17072            |                                                                                          | <i>otls833</i>              | <i>egas-4prom::TagRFP unc-122prom::GFP</i>                       | This study               |
| OH17217            |                                                                                          | <i>otls846</i>              | <i>egas-1promGFP unc-122prom::GFP</i>                            | This study               |
| PHX5452            | <i>ins-1(syb5452[ins-1::SL2::gfp::H2B])</i>                                              |                             |                                                                  | This study               |
| PHX3323            | <i>flp-14(syb3323 [flp-14::T2A::3XNLS::GFP])</i>                                         |                             |                                                                  | This study               |
| PHX4512            | <i>nlp-69(syb4512[nlp-69::SL2::gfp::H2B])</i>                                            |                             |                                                                  | This study               |
| PHX4440            | <i>npr-37(syb4440[npr-37::SL2::gfp::H2B])</i>                                            |                             |                                                                  | This study               |
| PHX5229            | <i>degl-2(syb5229[degl-2::SL2::gfp::H2B]),</i>                                           |                             |                                                                  | This study               |
| PHX4374            | <i>flp-32(syb4374[flp-32::SL2::gfp::H2B])</i>                                            |                             |                                                                  | This study               |
| PHX4447            | <i>aex-2(syb4447[aex-2::SL2::gfp::H2B])</i>                                              |                             |                                                                  | This study               |
| PHX4513            | <i>flp-5(syb4513[flp-5::SL2::gfp::H2B]),</i>                                             |                             |                                                                  | This study               |
| PHX4514            | <i>dmsr-2(syb4514 [dmsr-2::SL2::gfp::H2B])</i>                                           |                             |                                                                  | This study               |
| OH17241            | <i>unc-86(ot1158)</i>                                                                    |                             |                                                                  | This study               |
| PHX4537            | <i>unc-39(syb4537[unc-39::gfp])</i>                                                      |                             |                                                                  | This study               |
| OH17368            |                                                                                          | <i>otls854</i>              | <i>unc-39prom::TagRFP</i>                                        | This study               |
| OH17657            | <i>unc-39(syb4537ot1193[unc-39binding_site_mutant::unc-39::gfp])</i>                     |                             |                                                                  | This study               |
| CB257              | <i>unc-39(e257)</i>                                                                      |                             |                                                                  | (Brenner 1974)           |
| OH16543            | <i>unc-39(ok2137)</i>                                                                    | <i>otEx7581</i>             | <i>unc-39 fosmid WRM0636cG07 NotI cut @10 + inx-6p18::GFP @6</i> | This study               |
| OH17378            | <i>nlp-69(syb4512[nlp-69::SL2::gfp::H2B])<br/>unc-39(ot1172[unc-39<sup>R203Q</sup>])</i> |                             |                                                                  | This study               |
| OH15363            | <i>him-5(e1490)</i>                                                                      | <i>otls669</i>              | Bright NeuroPAL on V                                             | (Yemini et al. 2021)     |
| OH17491            | <i>unc-39(ot1173[unc-39<sup>R203Q</sup>]) him-5(e1490)</i>                               | <i>otls669</i>              |                                                                  | This study               |
| OH17709            | <i>nlp-69(syb4512) unc-39(ot1172)</i>                                                    | <i>otEx7870</i>             | <i>unc-39 mix 1*</i>                                             | (Flames and Hobert 2009) |
| OH17710            | <i>nlp-69(syb4512) unc-39(ot1172)</i>                                                    | <i>otEx7871</i>             | <i>unc-39 mix 1*</i>                                             | (Flames and Hobert 2009) |
| OH17713            | <i>unc-39(e257)</i>                                                                      | <i>otls833<br/>otEx7874</i> | <i>unc-39 mix 1*</i>                                             | (Flames and Hobert 2009) |
| OH17714            | <i>unc-39(e257)</i>                                                                      | <i>otls833<br/>otEx7875</i> | <i>unc-39 mix 1*</i>                                             | (Flames and Hobert 2009) |

|         |                                                              |                                                    |                                                                                            |                                                    |
|---------|--------------------------------------------------------------|----------------------------------------------------|--------------------------------------------------------------------------------------------|----------------------------------------------------|
| OH17709 | <i>degl-2(syb5229) unc-39(e257)</i>                          | <i>otEx7868</i>                                    | <i>unc-39 mix 1*</i>                                                                       | (Flames and Hobert 2009)                           |
| OH17710 | <i>degl-2(syb5229) unc-39(e257)</i>                          | <i>otEx7869</i>                                    | <i>unc-39 mix 1*</i>                                                                       | (Flames and Hobert 2009)                           |
| OH17711 | <i>unc-39(e257)</i>                                          | <i>otIs846</i><br><i>otEx7872</i>                  | <i>unc-39 mix 1*</i>                                                                       | (Flames and Hobert 2009)                           |
| OH17712 | <i>unc-39(e257)</i>                                          | <i>otIs846</i><br><i>otEx7873</i>                  | <i>unc-39 mix 1*</i>                                                                       | (Flames and Hobert 2009)                           |
| OH17709 | <i>nlp-69(syb4512) unc-39(ot1172)</i>                        | <i>otEx7870</i>                                    | <i>unc-39 mix 1*</i>                                                                       | (Flames and Hobert 2009)                           |
| OH15056 | <i>him-5(e1490) pha-1(e2123)</i>                             | <i>otIs354</i><br><i>otEx6986</i>                  | <i>otIs354[cho-1::YFP fosmid]</i><br><i>otEx6986[unc-17prom9::NLS:TagRFP pha-1 rescue]</i> | (Flames and Hobert 2009; Serrano-Saiz et al. 2020) |
| OH15601 |                                                              | <i>myIs13;</i><br><i>otIs703</i>                   | <i>myIs13[klp-6prom::GFP]</i><br><i>otIs703[flp-3prom::mCherry]</i>                        | <i>myIs13:</i><br>(Schroeder et al. 2013)          |
| OH17741 | <i>unc-39(e257)</i>                                          | <i>myIs13</i><br><i>otIs703</i><br><i>otEx7887</i> | <i>unc-39 mix 1*</i>                                                                       | This study                                         |
| OH17742 | <i>unc-39(e257)</i>                                          | <i>myIs13</i><br><i>otIs703</i><br><i>otEx7888</i> | <i>unc-39 mix 1*</i>                                                                       | This study                                         |
| OH16970 |                                                              | <i>otIs815</i>                                     | <i>klp-6p::mCherry + klp-6p::GFP::cla-1(S)</i>                                             | This study                                         |
| OH17357 |                                                              | <i>otIs815</i><br><i>otEx7771</i>                  | <i>unc-39 mix 2*</i>                                                                       | This study                                         |
| OH17358 |                                                              | <i>otIs815</i><br><i>otEx7772</i>                  | <i>unc-39 mix 2*</i>                                                                       | This study                                         |
| PHX4693 | <i>che-7(syb4693[che-7::SL2::gfp::H2B]),</i>                 |                                                    |                                                                                            | This study                                         |
| OH17377 | <i>che-7(syb4693) unc-39(ot1171[unc-39<sup>R203Q</sup>])</i> |                                                    |                                                                                            | This study                                         |
| OH17502 |                                                              | <i>otIs867</i>                                     | <i>srh-71prom::GFP 50ng/ul; pha-1 rescue 50ng/ul</i>                                       | This study                                         |
| OH16477 | <i>ceh-32(ot1040[ceh-32::gfp(SEC)])</i>                      |                                                    |                                                                                            | (Reilly et al. 2020)                               |
| OH15338 | <i>ceh-32(ok343)</i>                                         | <i>otEx7146</i>                                    | <i>ceh-32fosmid WRM0637dA10 ;myo-2::RFP</i>                                                | This study                                         |
| OH17709 | <i>nlp-69(syb4512) unc-39(ot1172)</i>                        | <i>otEx7870</i>                                    | <i>unc-39 mix 1*</i>                                                                       | (Flames and Hobert 2009)                           |
| OH17954 | <i>ceh-32(ok343)</i>                                         | <i>otEx7843</i>                                    | <i>mgl-1promRMDD/V (pFZ50 @30) slrf-7promRMD::TagRFP (pCC265 @30)</i>                      | (Flames and Hobert 2009)                           |
| OH17955 | <i>ceh-32(ok343)</i>                                         | <i>otEx7844</i>                                    | <i>mgl-1promRMDD/V (pFZ50 @30) slrf-7promRMD::TagRFP (pCC265 @30)</i>                      | (Flames and Hobert 2009)                           |
| OH16909 | <i>ceh-32(ok343) pha-1(e2190)</i>                            | <i>otEx7688</i>                                    | <i>mgl-1promRMDL/R (pMG249 @30) slrf-7promRMD::TagRFP</i>                                  | (Flames and Hobert 2009)                           |

|         |                                                                                             |                                     |                                                                                                       |                          |
|---------|---------------------------------------------------------------------------------------------|-------------------------------------|-------------------------------------------------------------------------------------------------------|--------------------------|
|         |                                                                                             |                                     | (pCC265 @20) <i>pha-1</i> rescue @50                                                                  |                          |
| OH16911 | <i>ceh-32(ok343) pha-1(e2190)</i>                                                           | <i>otEx7689</i>                     | <i>mgl-1promRMDL/R</i> (pMG249 @30) <i>slrf-7promRMD::TagRFP</i> (pCC265 @20) <i>pha-1</i> rescue @50 | (Flames and Hobert 2009) |
| OH16380 | <i>nlp-45(ot1032[nlp-45::T2A::GFP:H2B])</i>                                                 |                                     |                                                                                                       | (Sun and Hobert 2021)    |
| OH13026 |                                                                                             | <i>otIs568</i>                      | <i>unc-46fosmid::SL2::H2B::mCHOPTI; pha-1 rescue</i>                                                  | (Gendrel et al. 2016)    |
| PHX3278 | <i>flp-19(syb3278 [flp-19::T2A::3xNLS::GFP])</i>                                            |                                     |                                                                                                       | This study               |
| PHX4759 | <i>nlp-11(syb4759[nlp-11::SL2::GFP::H2B])</i>                                               |                                     |                                                                                                       | This study               |
| OH17794 | <i>nlp-11(syb4759[nlp-11::SL2::GFP::H2B])</i><br><i>unc-42(e419)</i><br><i>him-5(e1490)</i> | <i>otIs669</i>                      |                                                                                                       | This study               |
| OH17322 | <i>him-8(e1489)</i><br><i>ceh-32(ot1040[ceh-32::gfp(SEC)])</i><br><i>unc-42(ot1164)</i>     | <i>otIs696</i> (Yemini et al. 2021) | Dim NeuroPAL mix                                                                                      | This study               |
| OH17900 | <i>nlp-45(ot1032[nlp-45::T2A::GFP:H2B])</i>                                                 | <i>otEx7935</i>                     | <i>ceh-32</i> mix 1*                                                                                  | This study               |
| OH17901 | <i>nlp-45(ot1032[nlp-45::T2A::GFP:H2B])</i>                                                 | <i>otEx7936</i>                     | <i>ceh-32</i> mix 1*                                                                                  | This study               |
| OH17806 |                                                                                             | <i>otIs568</i><br><i>otEx7909</i>   | <i>ceh-32</i> mix 2*                                                                                  | This study               |
| OH17906 | <i>nlp-11(syb4759[nlp-11::SL2::GFP::H2B])</i>                                               | <i>otEx7937</i>                     | <i>ceh-32</i> mix 1*                                                                                  | This study               |
| OH17907 | <i>nlp-11(syb4759[nlp-11::SL2::GFP::H2B])</i>                                               | <i>otEx7938</i>                     | <i>ceh-32</i> mix 1*                                                                                  | This study               |
| OH17809 | <i>flp-19(syb3278 [flp-19::T2A::3xNLS::GFP])</i>                                            |                                     | <i>ceh-32</i> mix 2*                                                                                  | This study               |
| OH17810 | <i>flp-19(syb3278 [flp-19::T2A::3xNLS::GFP])</i>                                            |                                     | <i>ceh-32</i> mix 2*                                                                                  | This study               |

The *otIs703[flp-3prom::mCherry]* transgenes and the plasmids used in the IL2 *CLA-1* strain were kindly provided by Maryam Majeed, the *ceh-32* rescue strain OH15338 was created by Molly Reilly, and *unc-86(ot1158)* by Tessa Tekieli.

pFZ50(*mgl-1promRMDL/R::GFP*): (Zhang et al. 2014)

pMG249(*lgc-37prom5.4kbRMDL/R::GFP*): (Gendrel et al. 2016)

#### \* Ectopic expression mixes for *unc-39* and *ceh-32* misexpression

- ***unc-39* mix 1:**

*Ex[unc-17p9::unc-39::unc-39(pCC298@25ng/ul)*

*inx18pAVG::TagRFP(pCC220@25ng/ul)]* used for most *unc-39* misexpression

- ***unc-39* mix 2:**

*Ex[unc-17p9::unc-39::unc-39(pCC298@15ng/ul) unc-122prom::mCherry @30ng/ul]*

used for the *unc-39* misexpression in the *otIs815* IL2 *CLA-1* strain

- **ceh-32 mix 1:**  
*Ex[slrf-7p::ceh-32 (pCC327@40ng/ul); slrf-7P::tagRFP (pCC265@30ng/ul)] ceh-32*  
misexpression and labelling in all RMDs.
- **ceh-32 mix 2:**  
*Ex[slrf-7p::ceh-32 (pCC327@40ng/ul); inx-6prom(2TAAT-deletion)::GFP*  
*(pAB1@30ng/ul)] ceh-32* misexpression with a procorpus coinjection marker, no RMD  
labelling

## SI References

- Brenner S. 1974. The genetics of *Caenorhabditis elegans*. *Genetics* **77**: 71-94.
- Flames N, Hobert O. 2009. Gene regulatory logic of dopamine neuron differentiation. *Nature* **458**: 885-889.
- Gendrel M, Atlas EG, Hobert O. 2016. A cellular and regulatory map of the GABAergic nervous system of *C. elegans*. *eLife* **5**.
- Reilly MB, Cros C, Varol E, Yemini E, Hobert O. 2020. Unique homeobox codes delineate all the neuron classes of *C. elegans*. *Nature* **584**: 595-601.
- Schroeder NE, Androwski RJ, Rashid A, Lee H, Lee J, Barr MM. 2013. Dauer-specific dendrite arborization in *C. elegans* is regulated by KPC-1/Furin. *Curr Biol* **23**: 1527-1535.
- Serrano-Saiz E, Gulez B, Pereira L, Gendrel M, Kerk SY, Vidal B, Feng W, Wang C, Kratsios P, Rand JB et al. 2020. Modular Organization of Cis-regulatory Control Information of Neurotransmitter Pathway Genes in *Caenorhabditis elegans*. *Genetics* **215**: 665-681.
- Sun H, Hobert O. 2021. Temporal transitions in the post-mitotic nervous system of *Caenorhabditis elegans*. *Nature* **600**: 93-99.
- Yemini E, Lin A, Nejatbakhsh A, Varol E, Sun R, Mena GE, Samuel ADT, Paninski L, Venkatachalam V, Hobert O. 2021. NeuroPAL: A Multicolor Atlas for Whole-Brain Neuronal Identification in *C. elegans*. *Cell* **184**: 272-288 e211.
- Zhang F, Bhattacharya A, Nelson JC, Abe N, Gordon P, Lloret-Fernandez C, Maicas M, Flames N, Mann RS, Colon-Ramos DA et al. 2014. The LIM and POU homeobox genes *ttx-3* and *unc-86* act as terminal selectors in distinct cholinergic and serotonergic neuron types. *Development* **141**: 422-435.
